# Supplementary material for: Patient-derived cell models as preclinical tools for genome-directed targeted therapy
Source: PubMed Central journal article supplement (PMC4694854; doi:10.18632/oncotarget.4627), 2015-07-16
Supplement: oncotarget-06-25619-s001.pdf [file oncotarget-06-25619-s001.pdf]

## **SUPPLEMENTARY TABLES**

**Supplementary Table S1. Physiological characteristics and growth properties of established PDCs.**

**Supplementary Table S2. List of somatic mutations examined by Ion AmpliSeq Cancer Panel v2.**

**Supplementary Table S3. Variant calling result of P0, P1, P2 and PDX.** The table supports MAF format of TCGA
